# Supplementary material
Source: Springer Nature journal article supplement (https://www.springermedizin.de/resource/supplementary/12967_2012_1471_MOESM5_ESM.pdf/9574766)
Supplement: MOESM5 [file 9574766]

a

b

c

d
